# Supplementary material for: Pro-resolving lipid mediator ameliorates obesity induced osteoarthritis by regulating synovial macrophage polarisation
Source: PubMed Central journal article supplement (PMC6344566; doi:10.1038/s41598-018-36909-9), 2019-01-23
Supplement: 41598_2018_36909_MOESM1_ESM.pdf [file 41598_2018_36909_MOESM1_ESM.pdf]

# **Pro-resolving lipid mediator ameliorates obesity induced osteoarthritis by regulating synovial macrophage polarisation**

**Antonia RuJia Sun <sup>1</sup>, Xiaoxin Wu <sup>3</sup>, Bohao Liu <sup>3</sup>, Yang Chen <sup>3</sup>, Charles W. Armitage<sup>4</sup>,  
Avinash Kollipara<sup>4,5</sup>, Ross Crawford <sup>1,2</sup>, Kenneth W. Beagley<sup>4</sup>, Xinzhan Mao <sup>3\*</sup>, Yin Xiao <sup>1,6</sup>  
and Indira Prasadam <sup>1,6\*</sup>**

<sup>1</sup>Institute of Health and Biomedical Innovation, Faculty of Science and Engineering, Queensland University of Technology, Brisbane, Australia, 4059

<sup>2</sup>The Prince Charles Hospital, Orthopedic Department, Brisbane, Australia

<sup>3</sup>Department of Orthopaedic Surgery, Second Xiangya Hospital, Central South University, Changsha, China

<sup>4</sup>Institute of Health and Biomedical Innovation, Faculty of Health, School of Biomedical Sciences, Queensland University of Technology, Brisbane, Australia

<sup>5</sup>Department of Pediatrics, School of Medicine, The University of North Carolina at Chapel Hill, Chapel Hill, USA.

<sup>6</sup>Australia–China Centre for Tissue Engineering and Regenerative Medicine, Queensland University of Technology, Brisbane, Queensland, Australia

## **\*Corresponding author**

Indira Prasadam, Ph.D.

Email: [i.prasadam@qut.edu.au](mailto:i.prasadam@qut.edu.au)

Prof Xinzhan Mao, MBBS, FRACS, DPhil.

E-mail: [maoxinzhan72@126.com](mailto:maoxinzhan72@126.com)

Supplementary Figure 1

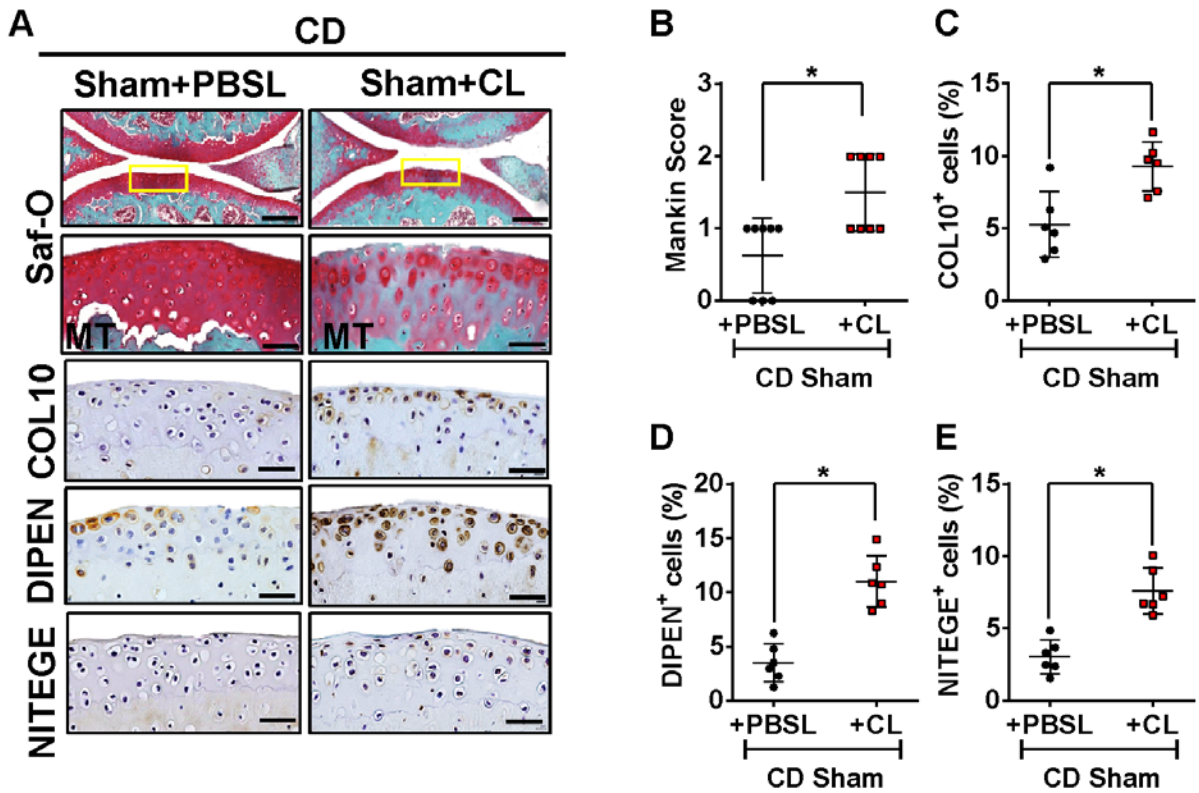

**Supplementary Figure 1:** Clodronate liposome causes cartilage damage in CD-fed mice. (A) Top panel: Representative Safranin O and fast green stained sagittal sections of knee regions in mice fed CD after Clodronate liposome treatment. Scale bars, 100 $\mu$ m. The inset boxes in upper re shown at higher resolution in lower panels. Scale bars, 100 $\mu$ m. Bottom panel: Similar sections were stained with COL10, DIPEN, and NITEGE to determine if Clodronate liposome attenuated cartilage damage. Scale bars, 100 $\mu$ m. (B) Severity of articular cartilage degradation was graded using Mankin scoring system. Graphs represent mean  $\pm$  SD (n=8).  $*=p<0.05$ . (C-E)The percentage of COL10 (C), DIPEN (D), and NITEGE (E)- positive cells per knee section were counted. Graphs represent mean  $\pm$  SD (n=6).  $*=p<0.05$ . PBSL: PBS liposome; CL: Clodronate liposome. Saf-O: Safranin O and fast green staining; MT: medial tibia.

## Supplementary Figure 2

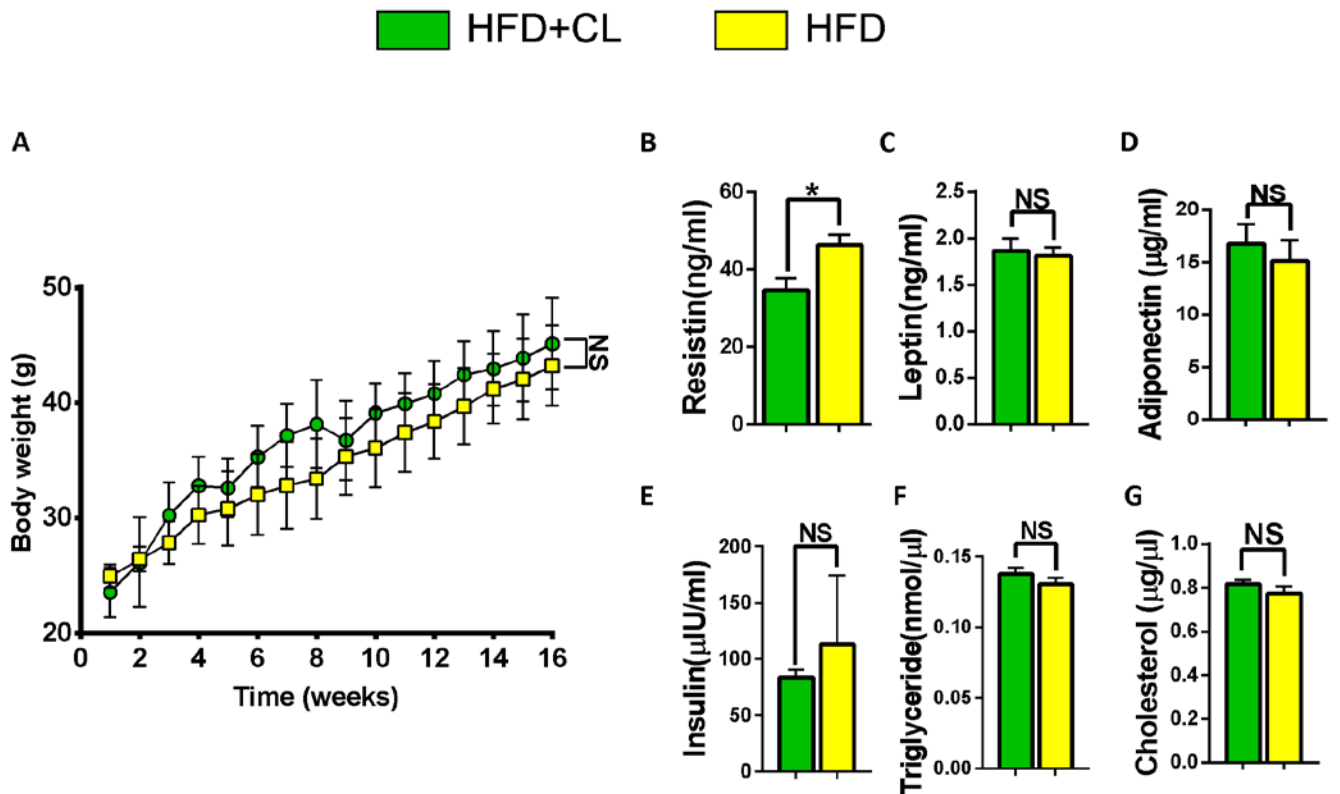

**Supplementary Figure 2 :** Local treatment of Clodronate liposome does not affect bodyweight but altered metabolic parameters. (A) Body weight of HFD+CL or HFD mice were monitored over 16 weeks. (B-J) Effect of CL on metabolic parameters. Measurement of serum resistin (B), leptin (C), adiponectin (D), insulin (E), triglyceride (G) and total cholesterol (H). Graphs represent mean  $\pm$  SD (n=5).  $*=p<0.05$ . HFD, High-fat diet-fed mice; CL, Clodronate liposome.

### Supplementary Figure 3

■ HFD+RvD1    ■ HFD

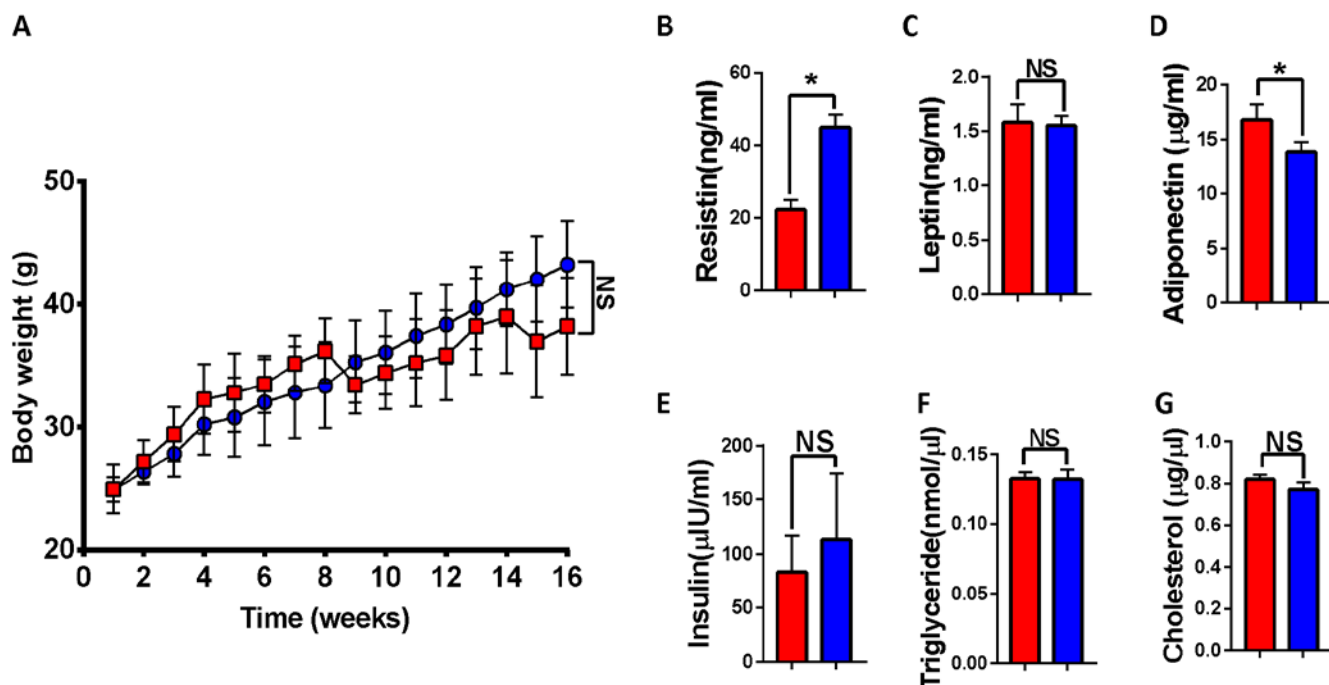

**Supplementary Figure 3 Legend:** Local treatment of resolvin D1 does not affect bodyweight but altered metabolic parameters. (A) Body weight of HFD+RvD1 or HFD mice were monitored over 16 weeks. (B-J) Effect of RvD1 on metabolic parameters. Measurement of serum resistin (B), leptin (C), adiponectin (D), insulin (E), triglyceride (G) and total cholesterol (H). Graphs represent mean  $\pm$  SD (n=5). \*= $p < 0.05$ . HFD, High-fat diet-fed mice; RvD1, resolvin D1.
